# Supplementary material for: Stem transcriptome screen for selection in wild and cultivated pitahaya (Selenicereus undatus): an epiphytic cactus with edible fruit
Source: PeerJ journal article supplement (doi:10.7717/peerj.14581), 2023-01-06
Supplement: SupplementaryMaterialR1Final.pdf [file SupplementaryMaterialR1Final.pdf]

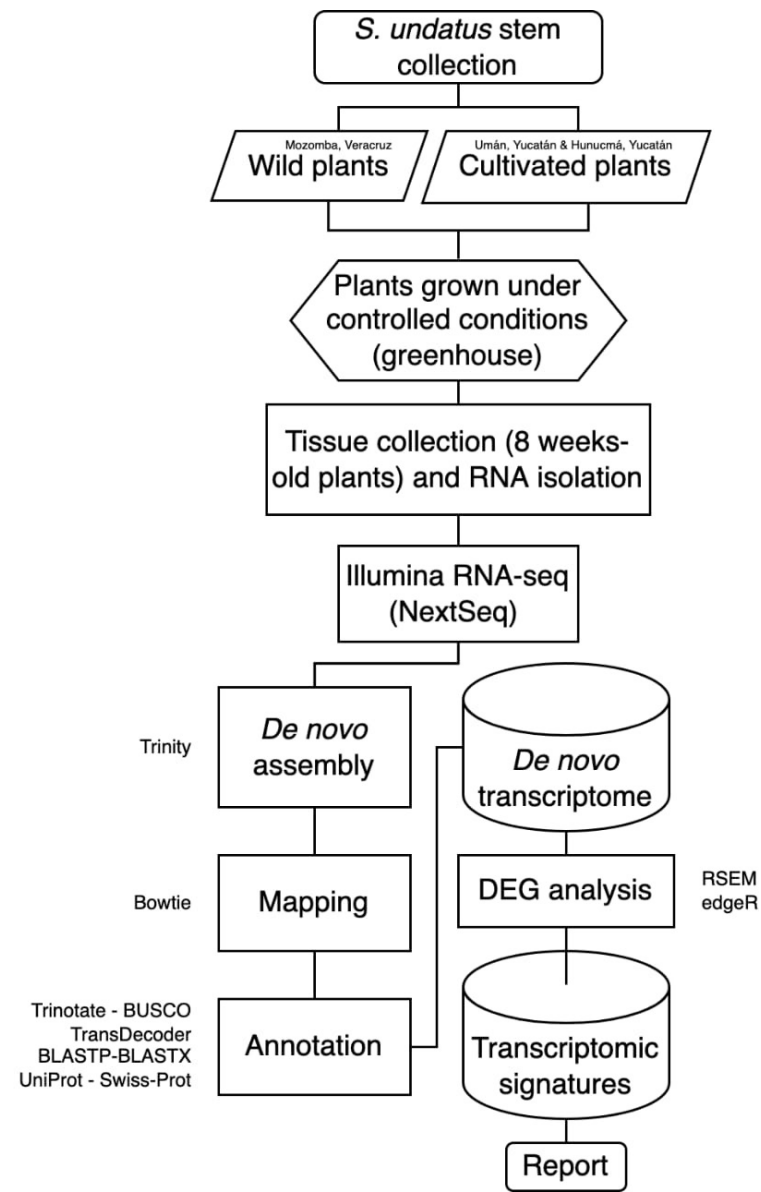

**Figure S1:** Work flow for sampling, greenhouse conditions and data analysis steps of the *de novo* transcriptome in *Selenicereus undatus*.

**a**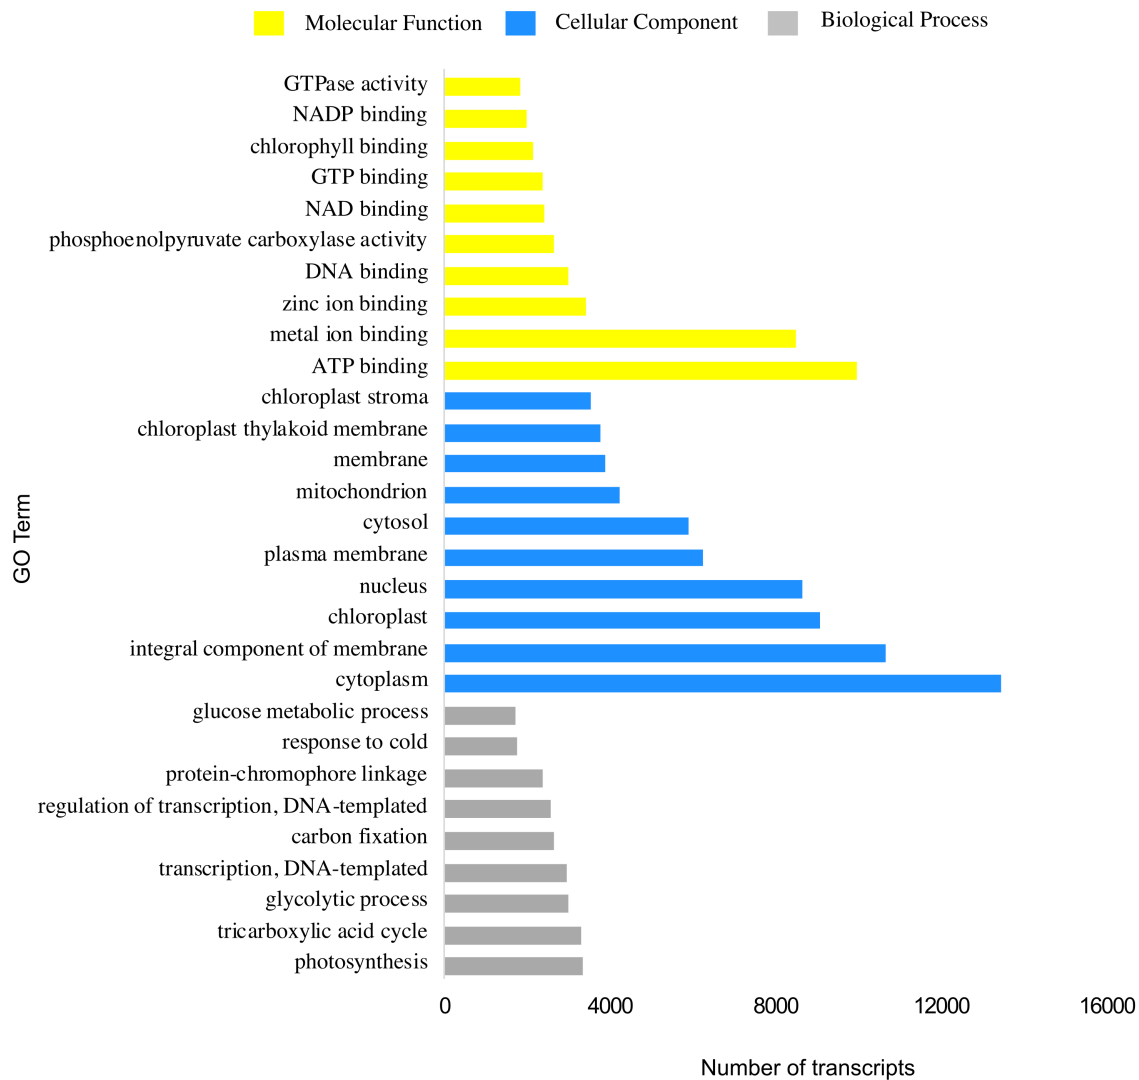**b**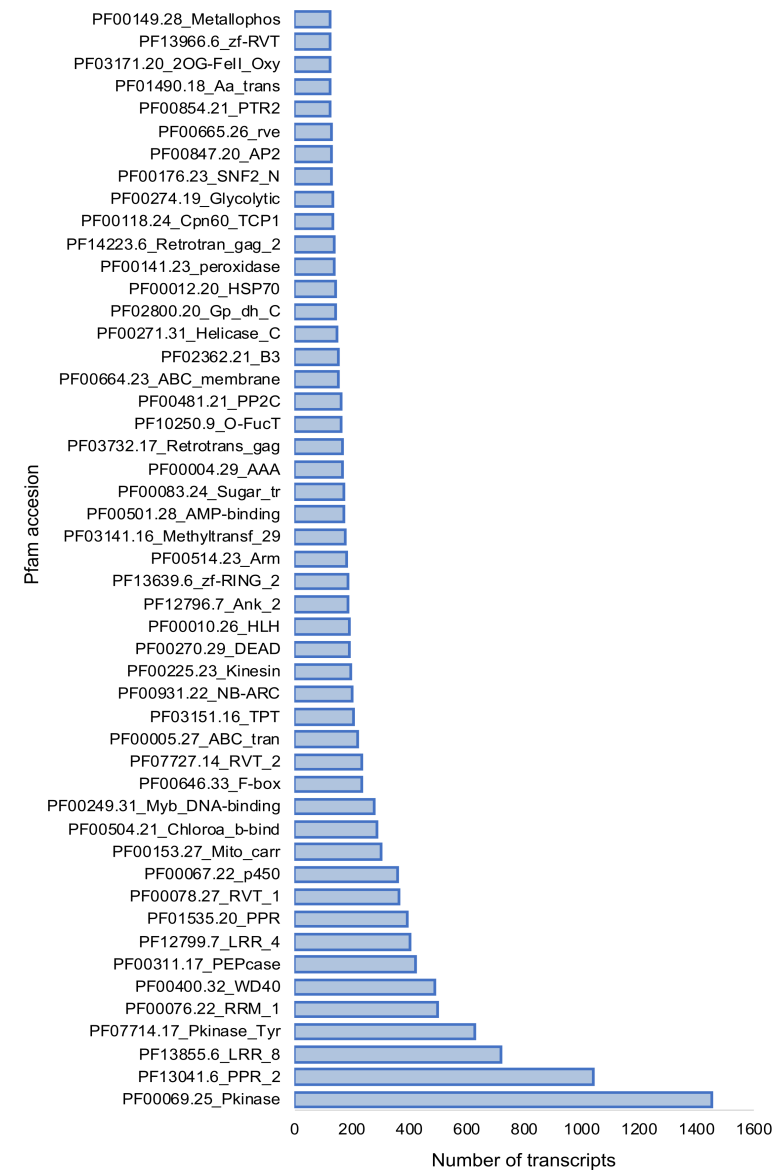

**Figure S2:** Distribution of *de novo* transcripts. a) Top ten gene ontology (GO) terms from transcriptome annotation, results for Molecular Function, Cellular Component and Biological Process. b) Top fifty distribution of Pfam domains found in the transcriptome (independent E-value < 10<sup>-5</sup> were considered).

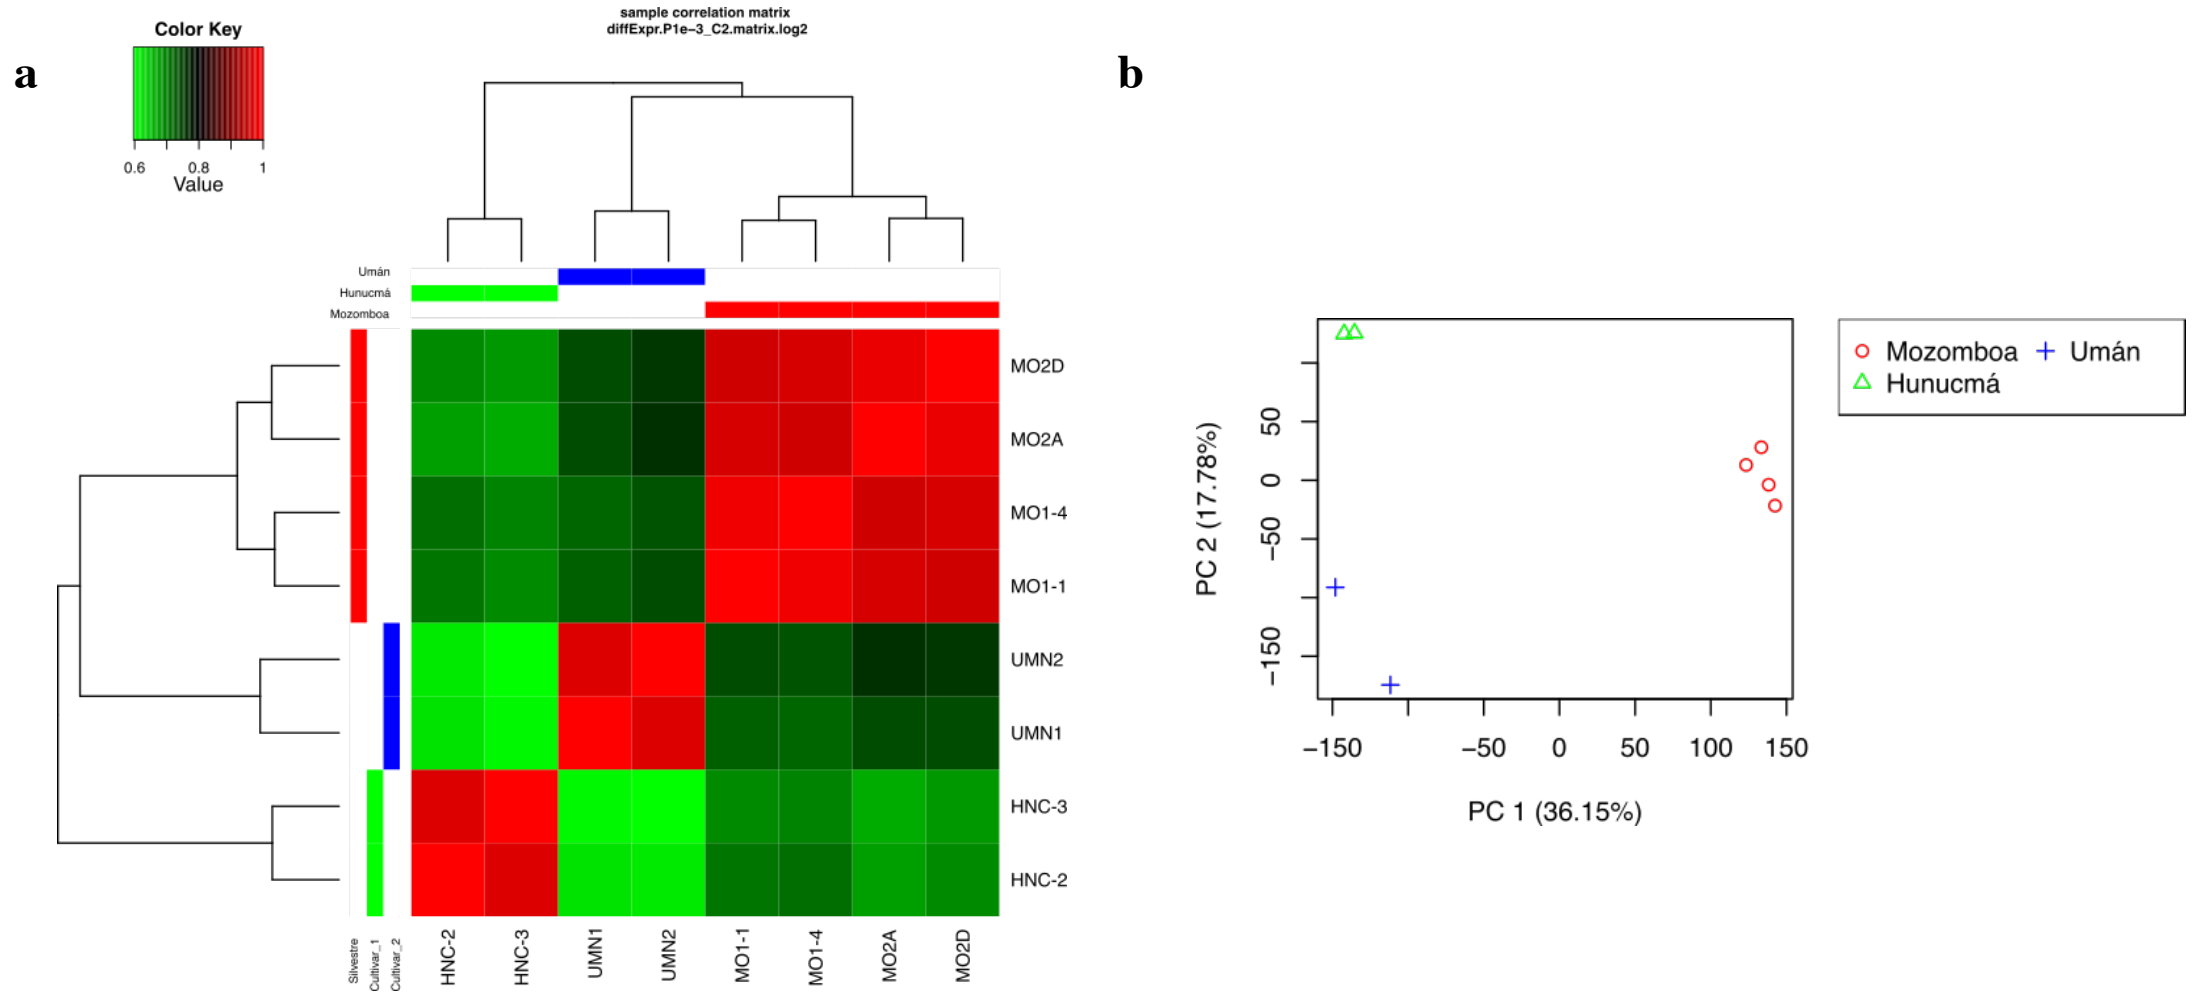

**Figure S3:** Comparative analysis of similarity across replicates of each sample.

a) Correlation matrix heatmap show the Pearson's correlation values (pairwise comparison) between Mozomboa wildtype plants (red bar) and the two cultivars Hunucmá (green bar) and Umán (blue bar). b) Principal Component Analysis (PCA) displaying the similarity among samples.

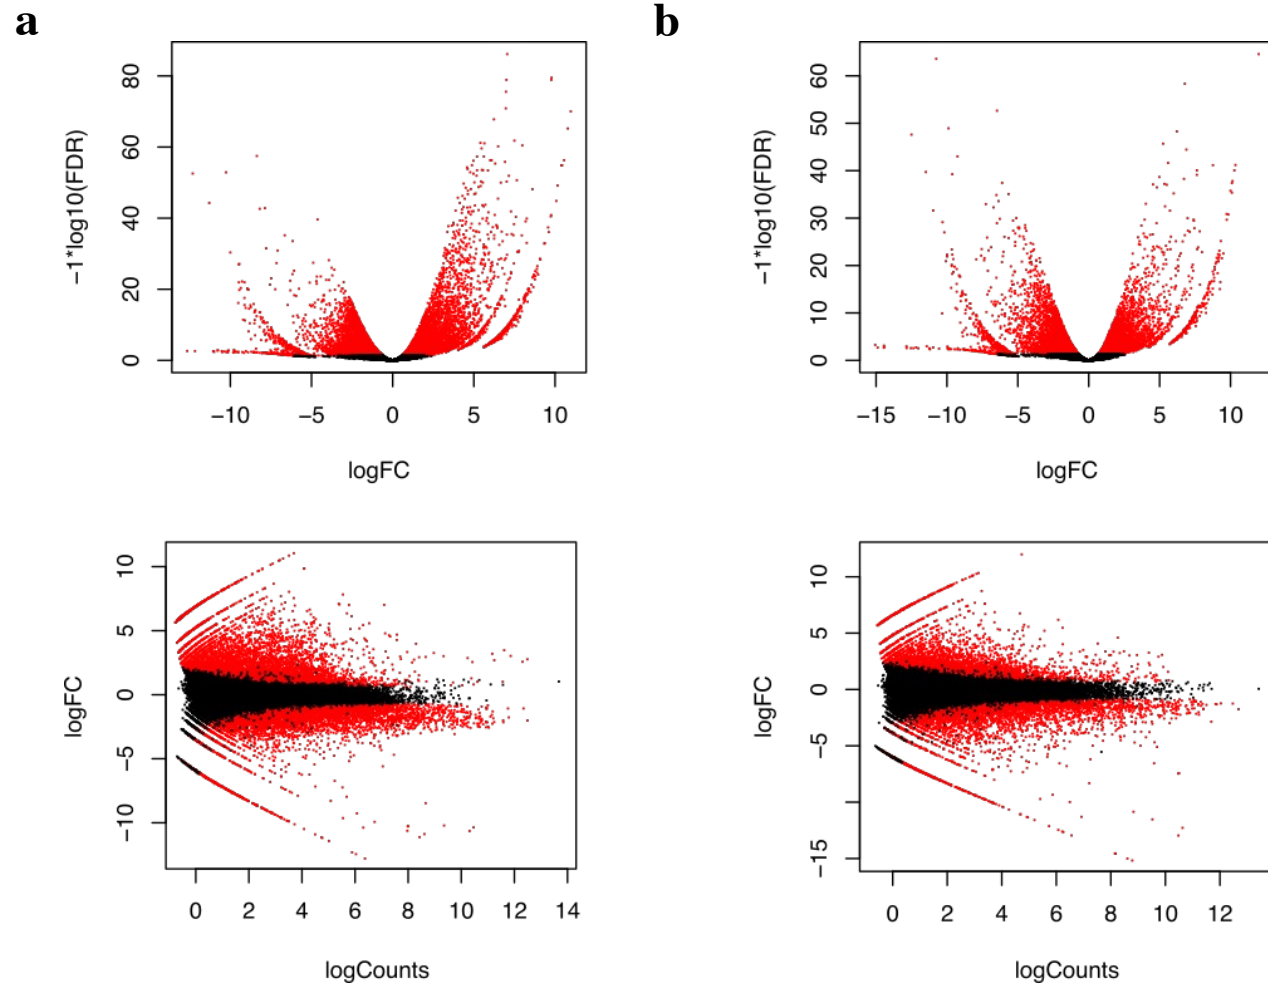

**Figure S4:** Distribution of differentially expressed genes identified (DEGs) in cultivars and wild type plants. a) Volcano plot (top row) and MA plots (bottom row) of DEGs between Hununcmá and Mozamboa plants. b) Volcano plot (top row) and MA plots (bottom row) of DEGs between Umán and Mozamboa plants.

**a**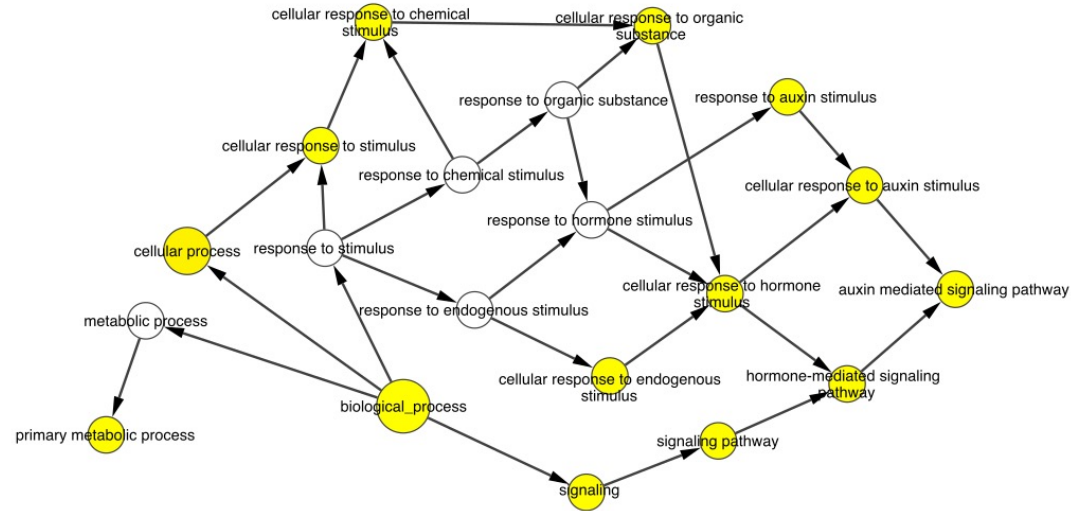**b**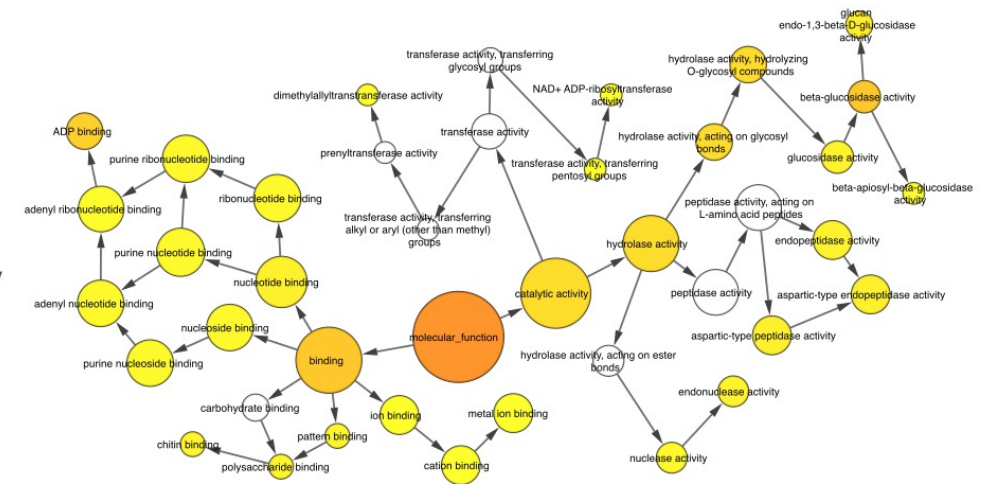

**Figure S5:** GO overrepresentation analysis with Up-regulated shared genes. a) Enrichment of GO terms in biological process by BiNGO (adjusted p-value < 0.05) and molecular function b) The size and color of each node indicate the number of enriched GO terms.

**a**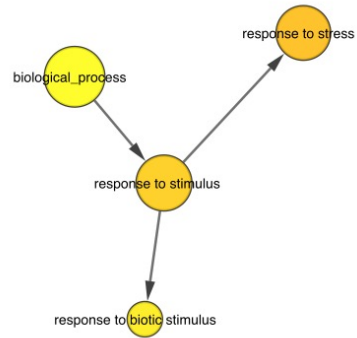**b**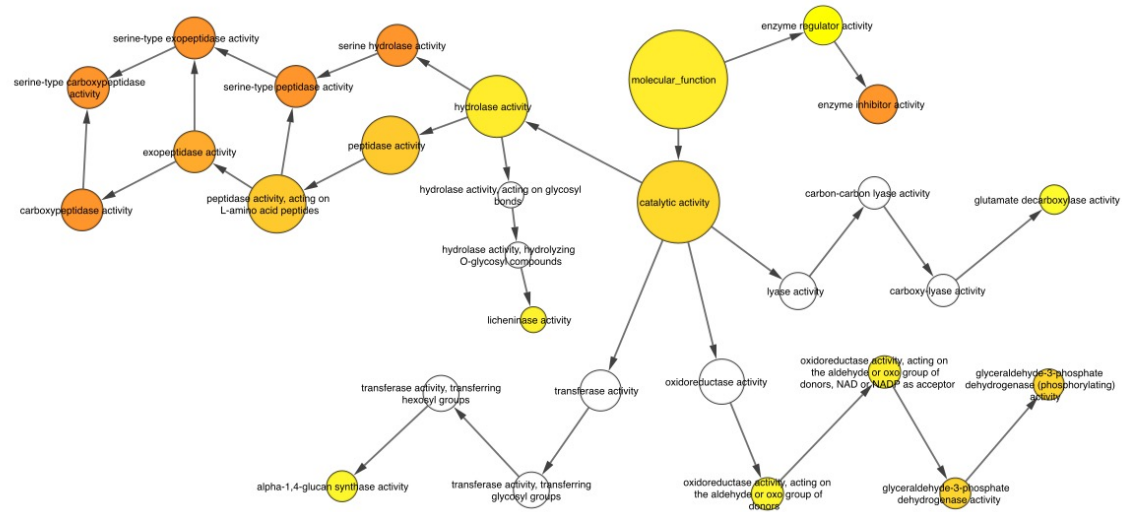

**Figure S6:** GO overrepresentation analysis with Down-regulated shared genes. a) Enrichment of GO terms in biological process by BiNGO (adjusted p-value < 0.05) and molecular function b) The size and color of each node indicate the number of enriched GO terms.

### Hunucmán

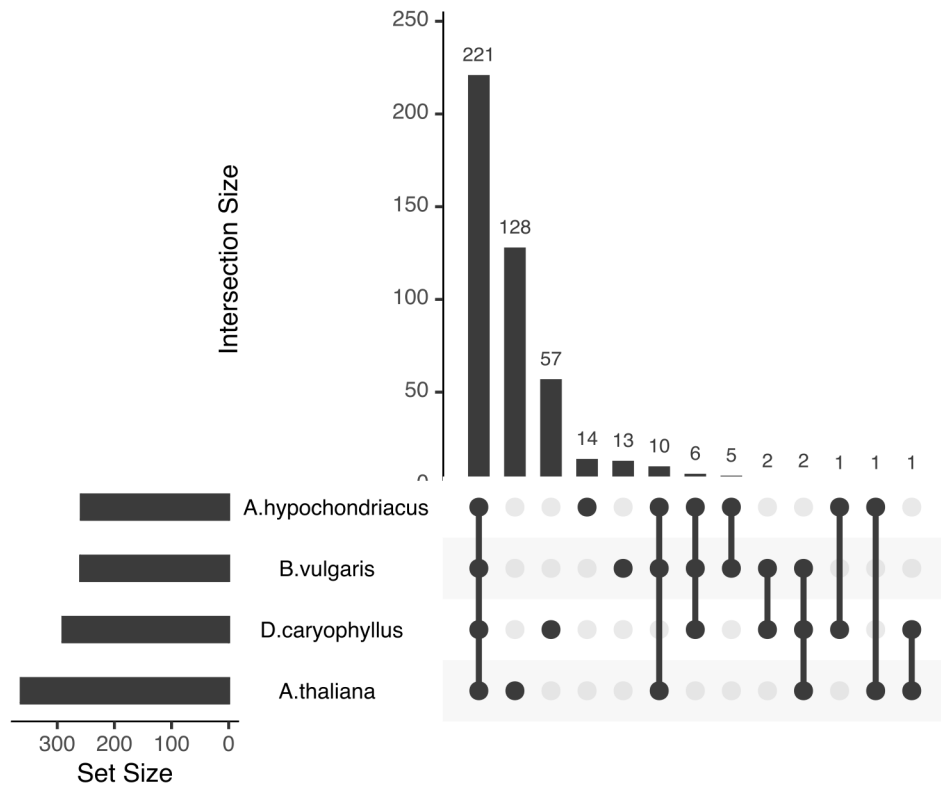

### Umán

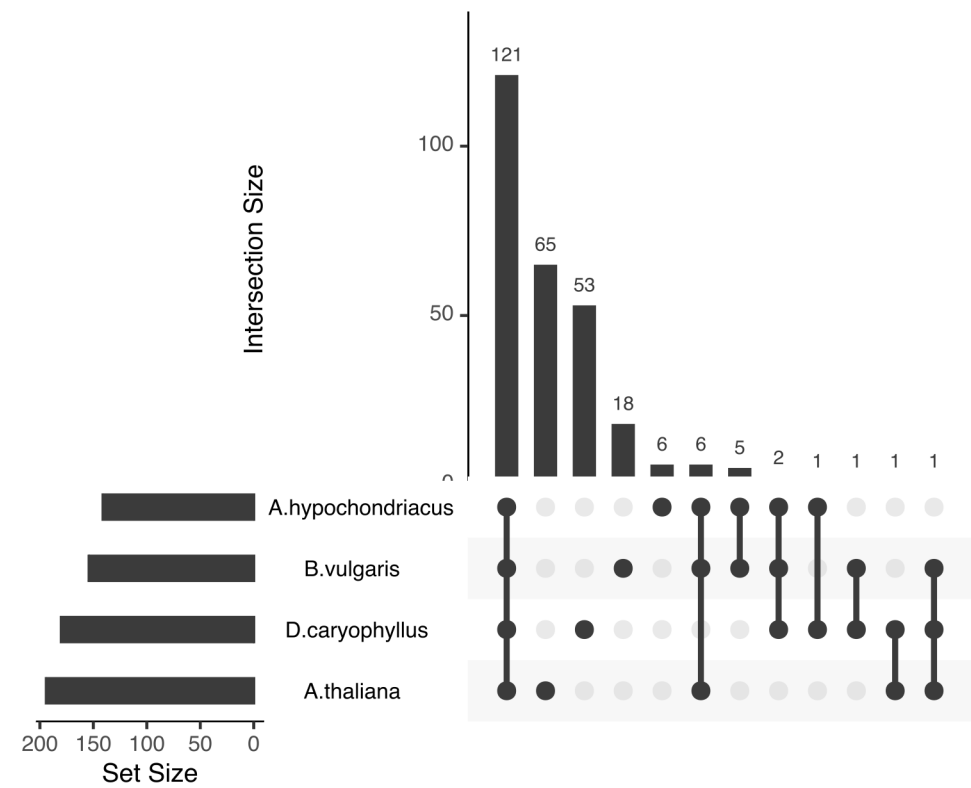

**Figure S7:** Distribution of BLASTX and BLASTP results in best hit among different species.

**Table S1** Summary of BUSCO statistics from the *Selenicereus undatus* assembled reference transcriptome compared to eudicotyledons and viridiplantae genes sets

|                                 | <b>Orthologs datasets</b> |                      |
|---------------------------------|---------------------------|----------------------|
|                                 | Viridiplantae_odb10       | Eudicotyledons_odb10 |
| Complete BUSCOs                 | 241 (56.1%)               | 1169 (55.2%)         |
| Complete and single-copy BUSCOs | 113 (26.3%)               | 521 (24.6%)          |
| Complete and duplicated BUSCOs  | 128 (29.8%)               | 648 (30.6%)          |
| Fragmented BUSCOs               | 141 (32.8%)               | 526 (24.8%)          |
| Missing BUSCOs                  | 48 (11.1%)                | 426 (20.0%)          |
| Total BUSCO groups searched     | 430                       | 2121                 |



**Table S2:** Summary of sequencing data obtained from stems of *S. undatus*.

| Sample ID | Location           | Total PE Reads |
|-----------|--------------------|----------------|
| MO1-1     | Mozomboa, Veracruz | 50,950,531     |
| MO1-4     | Mozomboa, Veracruz | 36,294,903     |
| MO2A      | Mozomboa, Veracruz | 38,977,914     |
| MO2D      | Mozomboa, Veracruz | 40,606,094     |
| HNC-2     | Hunucmá, Yucatán   | 38,333,077     |
| HNC-3     | Hunucmá, Yucatán   | 37,643,845     |
| UMN1      | Umán, Yucatán      | 46,686,003     |
| UMN2      | Umán, Yucatán      | 51,133,696     |
